# Supplementary material for: Association of Exposure to Intimate Partner Violence With Maternal Depressive Symptoms and Early Childhood Socioemotional Development Among Mothers and Children in Rural Tanzania
Source: PubMed Central journal article supplement (PMC9857043; doi:10.1001/jamanetworkopen.2022.48836), 2022-12-29
Supplement: jamanetwopen-e2248836-s001.pdf [file jamanetwopen-e2248836-s001.pdf]

## Data Sharing Statement

Ramos de Oliveira. Association of Exposure to Intimate Partner Violence With Maternal Depressive Symptoms and Early Childhood Socioemotional Development Among Mothers and Children in Rural Tanzania. *JAMA Netw Open*. Published December 29, 2022.  
doi:10.1001/jamanetworkopen.2022.48836

### Data

**Data available:** Yes

**Data types:** Other (please specify)

**Additional Information:** The data will be shared if requested.

**How to access data:** [crsudfeld@gmail.com](mailto:crsudfeld@gmail.com)

**When available:** With publication

### Supporting Documents

**Document types:** None

### Additional Information

**Who can access the data:** researchers whose proposed use of the data has been approved

**Types of analyses:** For research

**Mechanisms of data availability:** with investigator support
